# Supplementary material for: High Ammonium Addition Changes the Diversity and Structure of Bacterial Communities in Temperate Wetland Soils of Northeastern China
Source: MDPI journal article supplement (doi:10.3390/microorganisms11082033), 2023-08-08
Supplement: s1 [file s1]

**Table S1. PERMANOVA (ADONIS) analysis of bacteria comparing the three N addition treatments.**

|                        | $R^2$ | $P$   |
|------------------------|-------|-------|
| CK versus LN versus HN | 0.48  | 0.008 |
| CK versus LN           | 0.24  | 0.2   |
| CK versus HN           | 0.45  | 0.1   |
| LN versus HN           | 0.48  | 0.1   |

CK: control; LN: low ammonium; HN: high ammonium.

**Table S2. Permutational analysis of multivariate dispersions (PERMDISP) analysis of bacteria comparing the three N addition treatments.**

| Centroid of CK | Centroid of LN | Centroid of HN | F      | $P$    |
|----------------|----------------|----------------|--------|--------|
| 0.2344         | 0.1969         | 0.211          | 1.5622 | 0.312  |
| 0.2344         | ——             | 0.211          | 1.0679 | 0.4014 |
| 0.2344         | 0.1969         | ——             | 2.1614 | 0.4014 |
| ——             | 0.1969         | 0.211          | 0.8061 | 0.4014 |

CK: control; LN: low ammonium; HN: high ammonium.

**Table S3. Significance of the soil physicochemical properties in explaining the bacterial community structure obtained from the RDA results.**

|                              | $R^2$ | $P$   |
|------------------------------|-------|-------|
| SMC                          | 0.820 | <0.01 |
| pH                           | 0.783 | <0.05 |
| NO <sub>3</sub> <sup>-</sup> | 0.787 | <0.01 |
| NH <sub>4</sub> <sup>+</sup> | 0.403 | >0.05 |
| DOC                          | 0.639 | <0.05 |
| DON                          | 0.591 | >0.05 |
| TN                           | 0.767 | <0.05 |
| SOC                          | 0.373 | >0.05 |

CK: control; LN: low ammonium; HN: high ammonium. SMC: soil moisture contents; DOC: dissolved organic carbon; DON: dissolved organic nitrogen; TN: total nitrogen; SOC: soil organic carbon.

**Table S4. Pearson correlation of soil variables with alpha-diversity indices**

|               | SMC    | pH    | NO <sub>3</sub> <sup>-</sup> | NH <sub>4</sub> <sup>+</sup> | DOC   | DON   | TN     | SOC   |
|---------------|--------|-------|------------------------------|------------------------------|-------|-------|--------|-------|
| Chao index    | -0.38  | 0.22  | -0.33                        | 0.28                         | -0.45 | -0.17 | -0.45  | -0.22 |
| Shannon index | -0.76* | 0.63  | -0.67*                       | 0.54                         | -0.62 | -0.59 | -0.76* | -0.47 |
| Simpson index | 0.69*  | -0.52 | 0.63                         | -0.38                        | 0.68* | 0.49  | 0.71*  | 0.49  |

CK: control; LN: low ammonium; HN: high ammonium. SMC: soil moisture contents; DOC: dissolved organic carbon; DON: dissolved organic nitrogen; TN: total nitrogen; SOC: soil organic carbon. \*represents significant spearman correlation at 0.05 level.

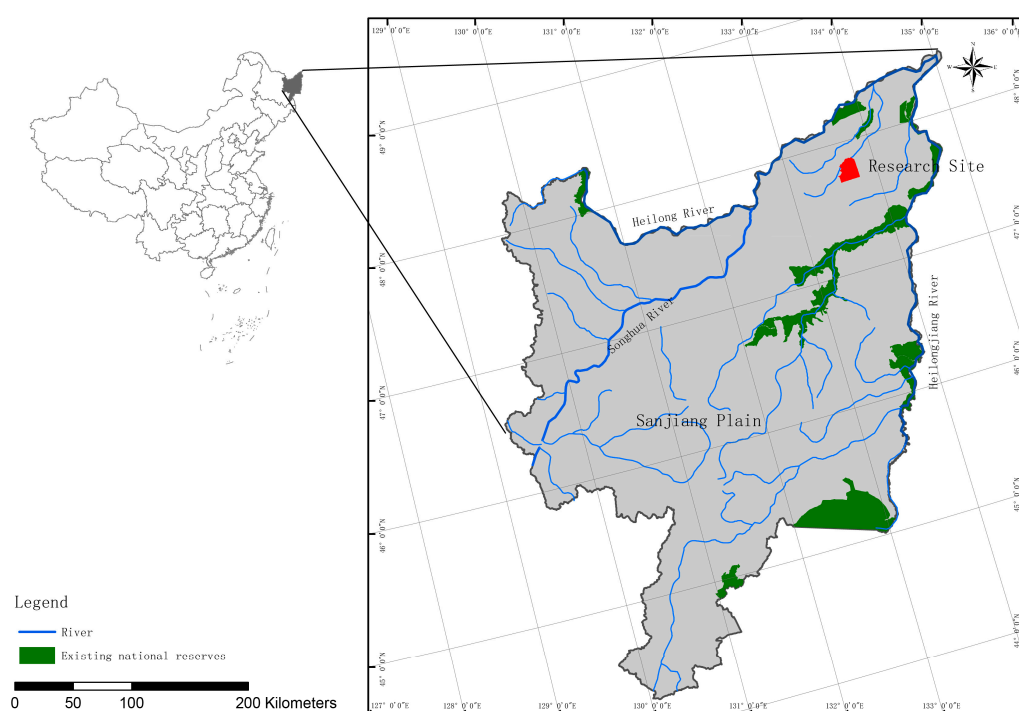

**Figure S1.** Honghe nature reserve in Sanjiang Plain.

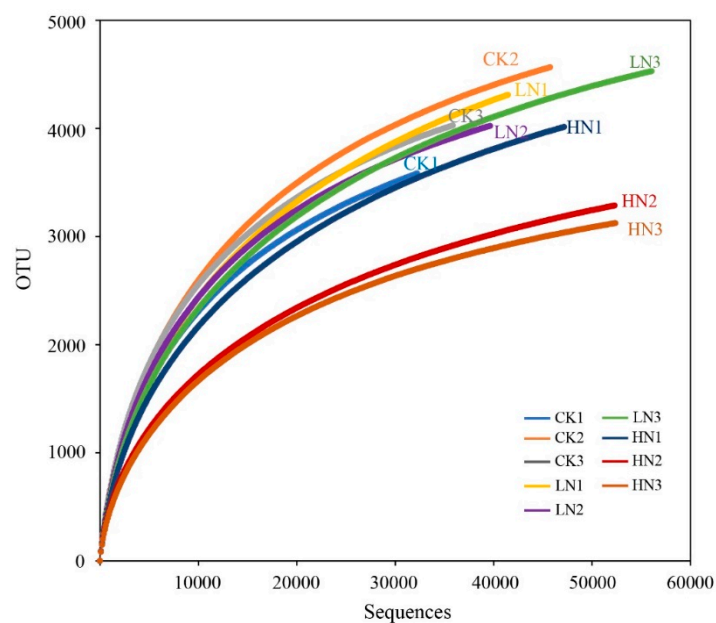

**Figure S2.** Rarefaction curves of soil bacteria in the different nitrogen treatment. CK: control; LN: low nitrogen; HN: high nitrogen.

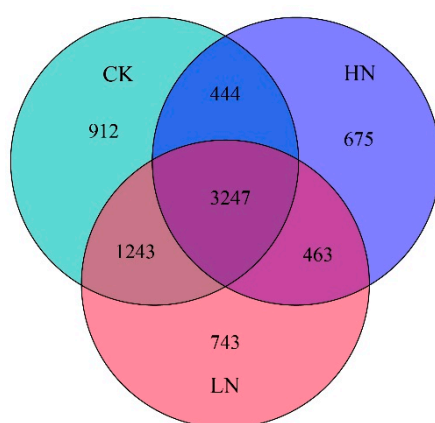

**Figure S3.** Venn diagram showing the numbers of shared and exclusive OTUs in different nitrogen treatments. CK: control; LN: low ammonium; HN: high ammonium.

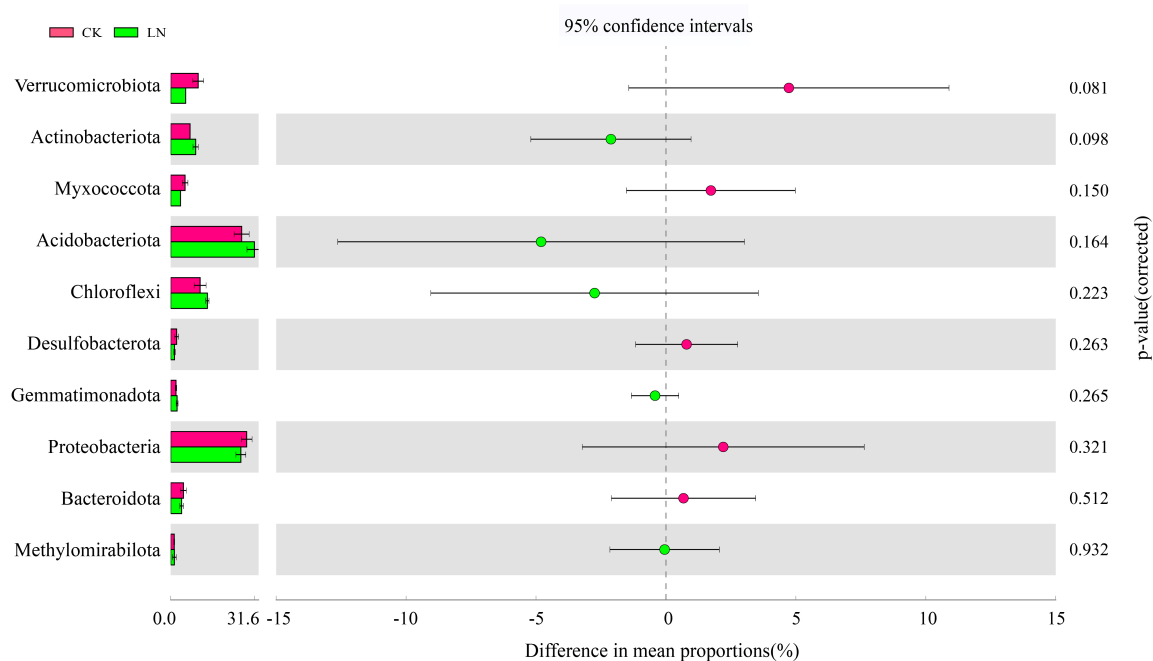

**Figure S4.** Relative abundance of bacterial phyla (relative abundance top 10) under different N addition levels (CK versus LN). Values in the bar plot are expressed as mean  $\pm$  standard error. The colored circles represent the 95% confidence intervals. \* indicated a significant difference at 0.5 level. CK: control; LN: low ammonium.

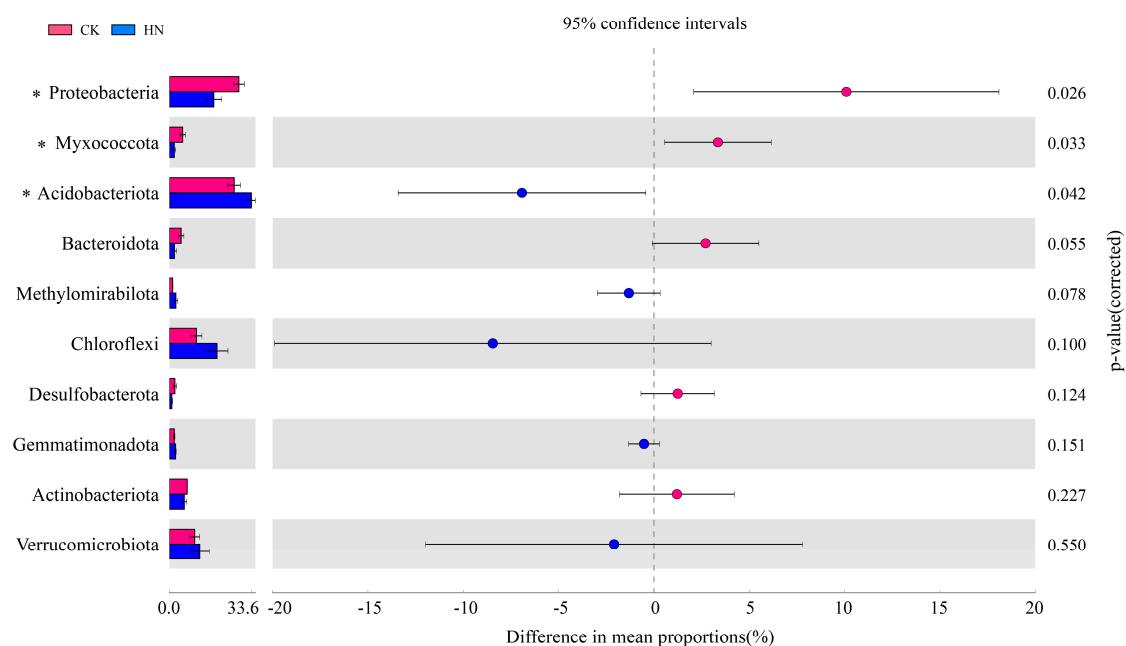

**Figure S5.** Relative abundance of bacterial phyla (relative abundance top 10) under different N addition levels (CK versus HN). Values in the bar plot are expressed as mean  $\pm$  standard error. The colored circles

represent the 95% confidence intervals. \* indicated a significant difference at 0.5 level. CK: control; HN: high ammonium.

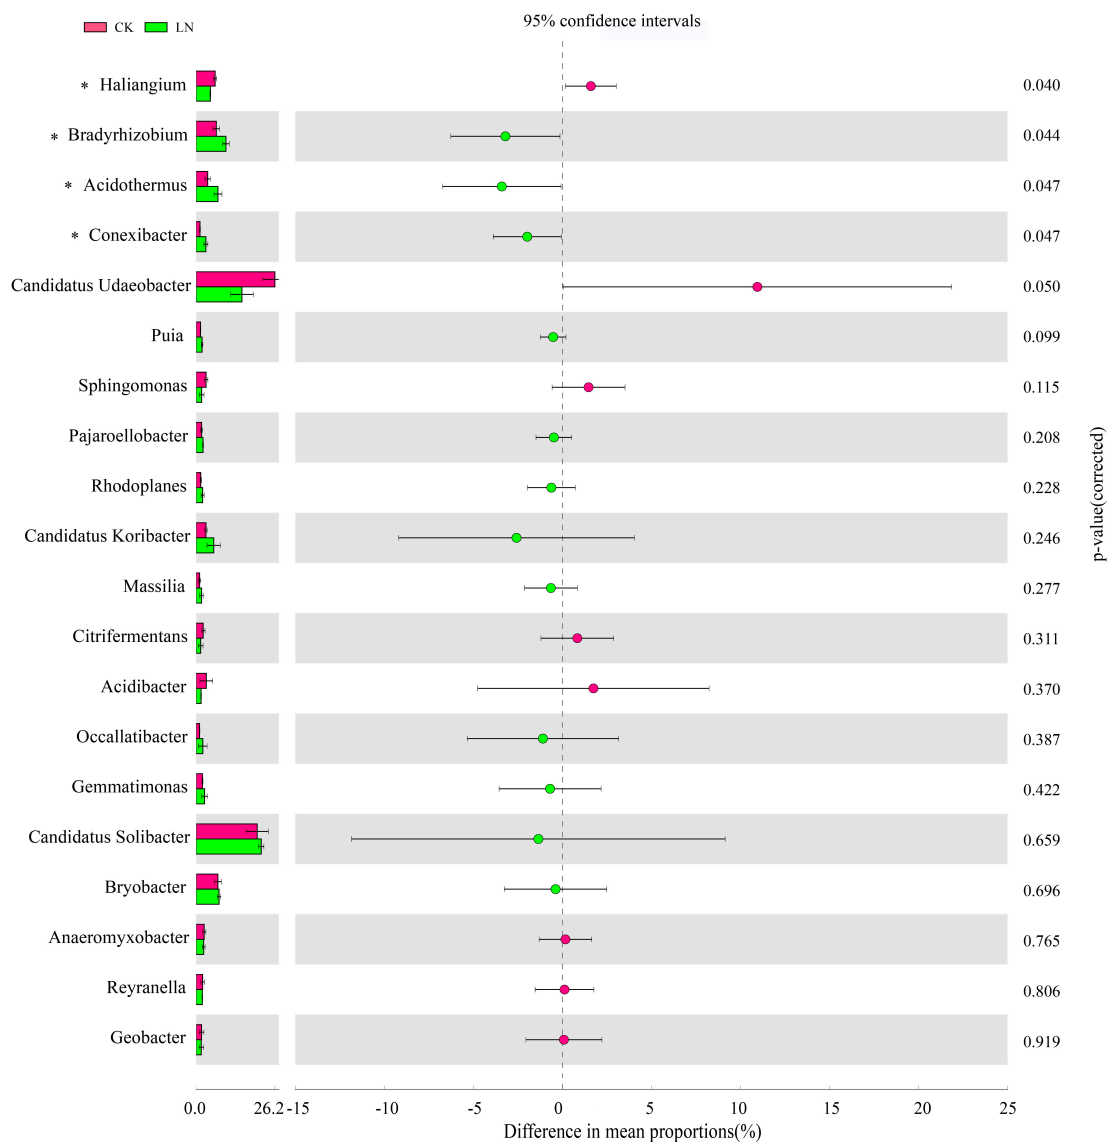

**Figure S6.** Relative abundance of bacterial genera (top 20 genera were shown) under different N addition levels (CK versus LN). Values in the bar plot are expressed as mean  $\pm$  standard error. The colored circles represent the 95% confidence intervals. \* indicated a significant difference at 0.5 level. CK: control; LN: low ammonium.

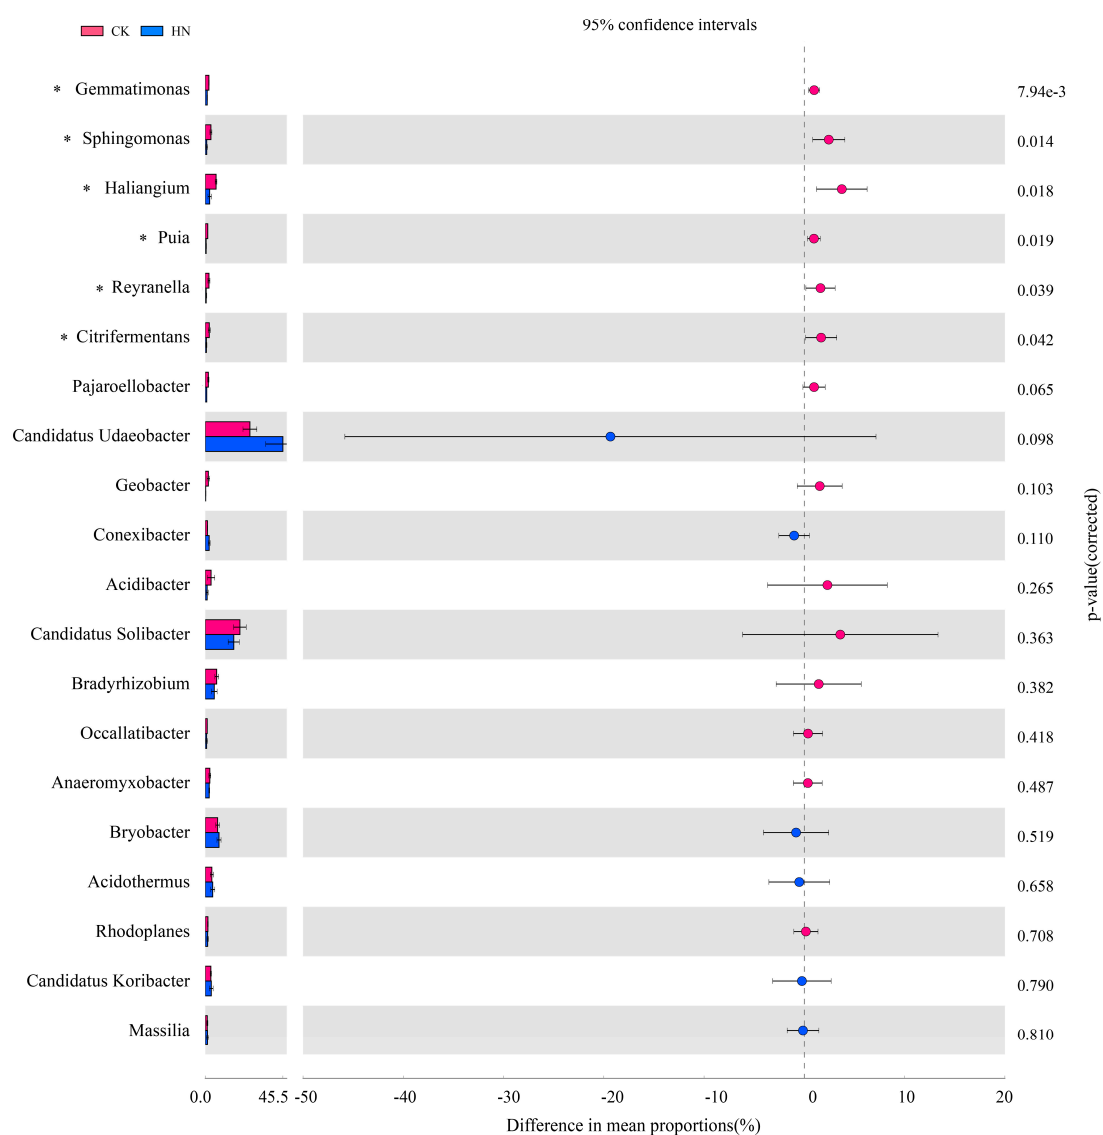

**Figure S7.** Relative abundance of bacterial genera (top 20 genera were shown) under different N addition levels (CK versus HN). Values in the bar plot are expressed as mean  $\pm$  standard error. The colored circles represent the 95% confidence intervals. \* indicated a significant difference at 0.5 level. CK: control; HN: high ammonium.
